# Supplementary material for: Geospatial Synthesis of Biogeochemical Attributions of Porphyrins to Oil Pollution in Marine Sediments of the Gulf of México
Source: MDPI journal article supplement (doi:10.3390/geosciences12020077), 2022-02-06
Supplement: s1 [file s1]

# Geospatial Synthesis of Biogeochemical Attributions of Porphyrins to Oil Pollution in Marine Sediments of the Gulf of México

Francisco Muñoz-Arriola <sup>1,2,\*</sup> and José Vinicio Macías-Zamora <sup>3</sup>

## Supplementary Materials

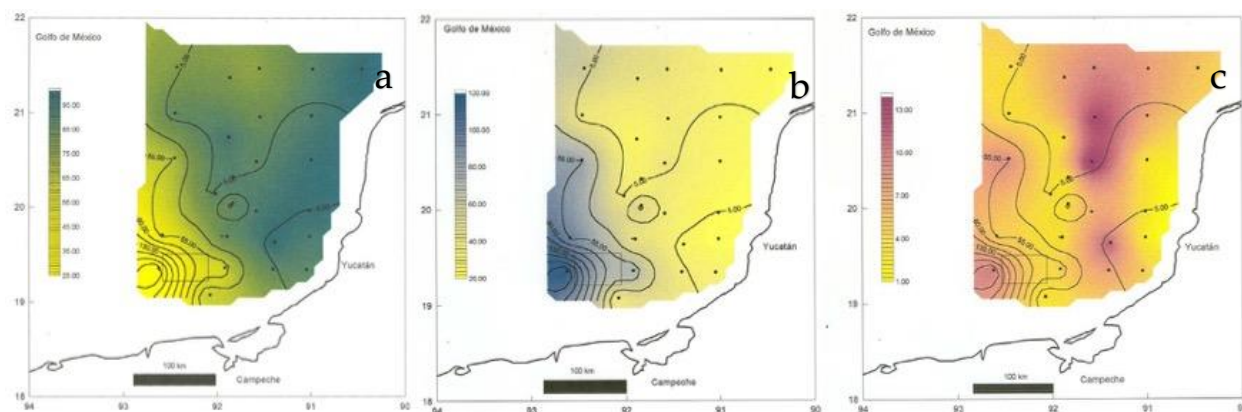

**Figure S1.** Spatial distribution of (a) Carbonates [%], (b) Vanadium [μg/g], and (c) Total Hydrocarbons [μg/g]. The lines represent the gradients of VO porphyrins [ng/g] in the top layer (0–2 cm).
